# Supplementary material for: Hierarchical porous Li4Ti5O12–TiO2 composite anode materials with pseudocapacitive effect for high-rate and low-temperature applications
Source: Royal Society of Chemistry journal article supplement (doi:10.1039/c8ta03172j), 2018-01-01
Supplement: c8ta03172j1.pdf [file c8ta03172j1.pdf]

## Supporting Information

# Hierarchical Porous $\text{Li}_4\text{Ti}_5\text{O}_{12}$ - $\text{TiO}_2$ Composite Anode Materials with Pseudocapacitive Effect for High-Rate and Low-Temperature application

Chao Huang<sup>a,b</sup>, Shi-Xi Zhao<sup>a\*</sup>, Hang Peng<sup>a,b</sup>, Yuan-Hua Lin<sup>b</sup> and Ce-Wen Nan<sup>b</sup>, Guo-Zhong Cao<sup>c\*</sup>

<sup>a</sup>Graduate School at Shenzhen, Tsinghua University, Shenzhen, 518055, China.

<sup>b</sup>School of Materials Science and Engineering, Tsinghua University, Beijing, 100084, China

<sup>c</sup>Department of Materials Science and Engineering, University of Washington, Seattle, WA 98195, USA

\*Corresponding author: Email: [zhaosx@sz.tsinghua.edu.cn](mailto:zhaosx@sz.tsinghua.edu.cn) (S.X.Zhao); [gzc@uw.edu](mailto:gzc@uw.edu) (G.Z.Cao)

## Supplementary Figures

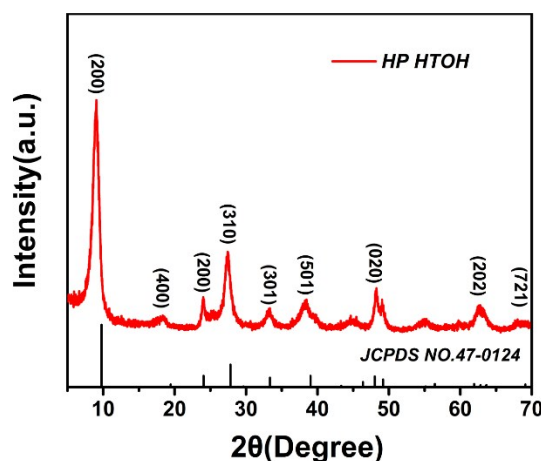

**Figure S1.** The XRD patterns of as-prepared hierarchical hydrogen porous titanium oxide hydrate (HP HTOH) microspheres.

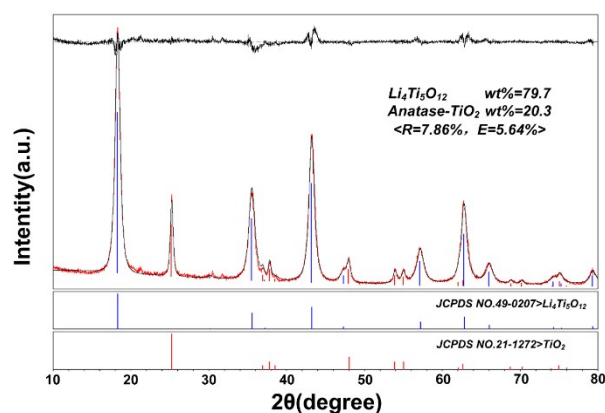

**Figure S2.** The XRD refinement data of HP LTO-TO microspheres.

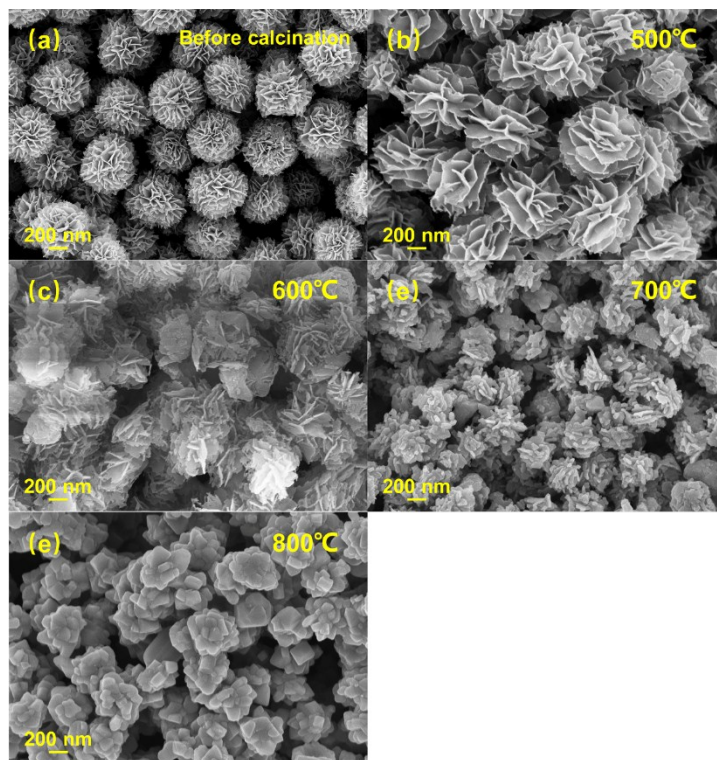

**Figure S3.** The SEM images of HP LHTO (a) before and (b-f) after calcined at 500, 600, 700 and 800 °C for 2h in air.

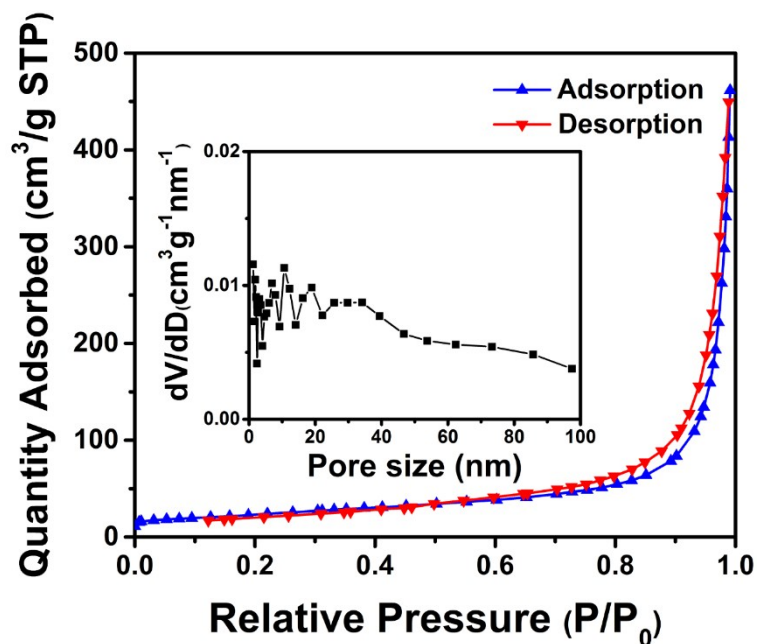

**Figure S4.** Nitrogen adsorption-desorption isotherms and the Barrett-Joyner-Halenda (BJH) pore size distributions of the HP LTO-TO microspheres sample of Li: Ti=5:5 calcined at 500 °C for 2 h.

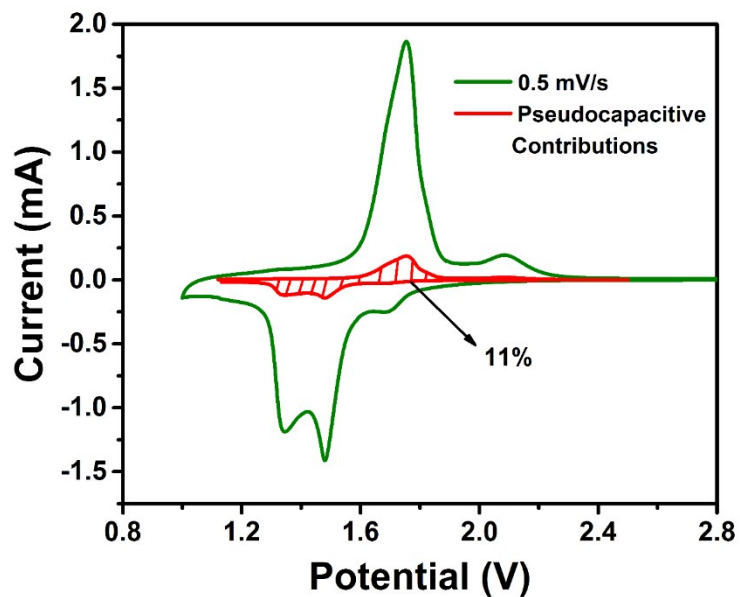

**Figure S5.** the ratios of the faradaic pseudocapacitive effect and diffusion-limited reaction benefiting enhancement of capability. The data were taken at the slow sweep rate of 0.5 mV/s.

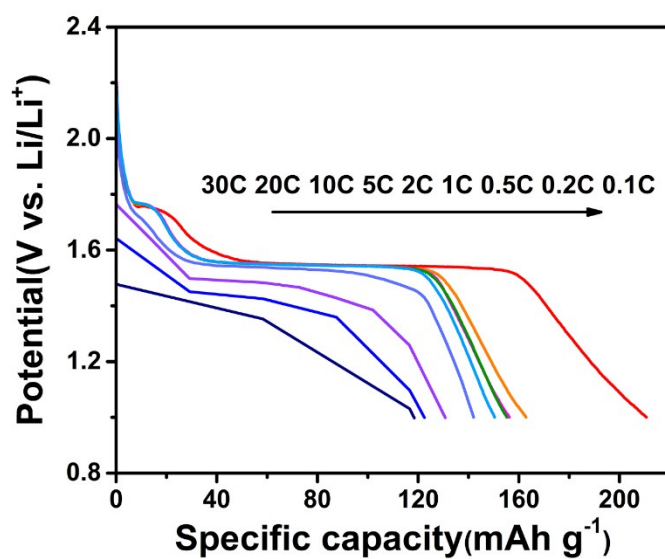

**Figure S6.** The discharge voltage profiles of HP LHTO at various current density from 0.1 C to 30 C (broken line is due to the test program take less points at larger rate).

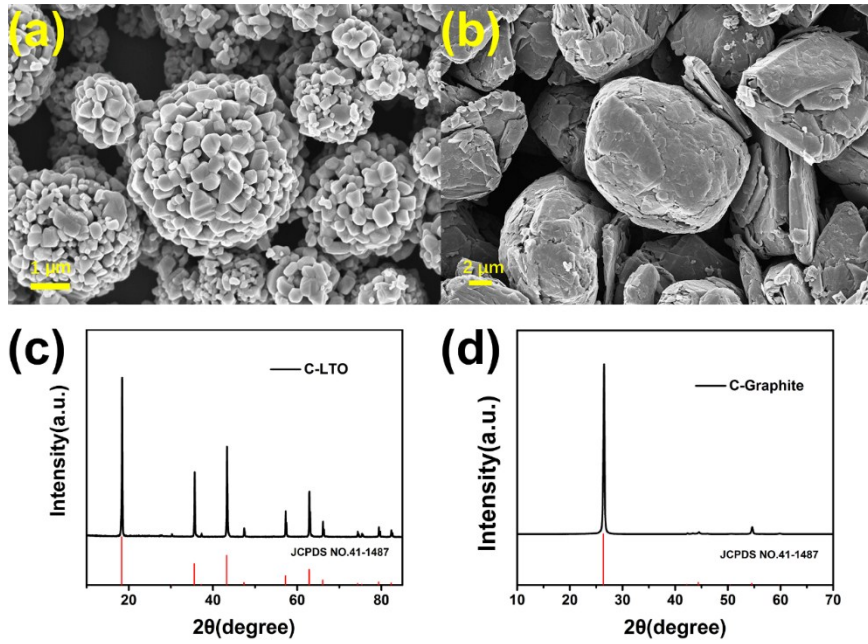

**Figure S7.** The XRD patterns and SEM images of (a,c) a commercial LTO (b,d) a commercial graphite.

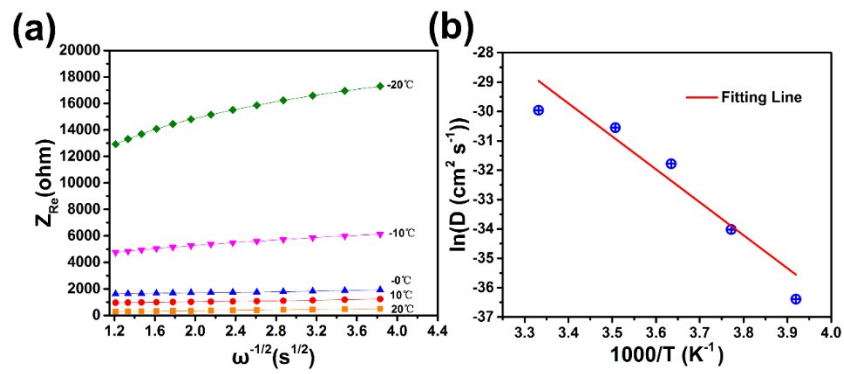

**Figure S8.** (a) Graph of  $Z_{Re}$  plotted against  $\omega^{-1/2}$  at low frequency section of C-LTO. (b) The linear relationship between  $\ln D$  and  $10^3/T$  at different temperature.
